# Supplementary material
Source: MDPI journal article supplement (https://www.mdpi.com/1424-8247/14/11/1202)
Supplement: s1 [file s1]

**Table S2.** Search strategies

## MEDLINE

| Searching strategy |                                                                                                                                                                                                                                                                                                                                                                                                                                                                                                              |
|--------------------|--------------------------------------------------------------------------------------------------------------------------------------------------------------------------------------------------------------------------------------------------------------------------------------------------------------------------------------------------------------------------------------------------------------------------------------------------------------------------------------------------------------|
| #1                 | mononeuropathy[MeSH] OR nerve compression syndromes[MeSH] OR neuralgia[MeSH] OR polyneuropathies [MeSH]                                                                                                                                                                                                                                                                                                                                                                                                      |
| #2                 | “neuropathy”[Title/abstract] OR “peripheral neuropathy”[Title/abstract] OR “neuropathic pain”[Title/abstract] OR “neuralgia”[Title/abstract]                                                                                                                                                                                                                                                                                                                                                                 |
| #3                 | “Plants, Medicinal”[MeSH] OR “Drugs, Chinese Herbal”[MeSH] OR “Medicine, Chinese Traditional”[MeSH] OR “Medicine, Kampo”[MeSH] OR “Medicine, Korean Traditional”[MeSH] OR “Herbal Medicine”[MeSH] OR “Prescription Drugs”[MeSH] OR “traditional Korean medicine”[Title/abstract] OR “traditional Chinese medicine”[Title/abstract] OR “traditional oriental medicine”[Title/abstract] OR “Kampo medicine”[Title/abstract] OR herb*[Title/abstract] OR decoction*[Title/abstract] OR botanic*[Title/abstract] |
| #4                 | #1 AND #2 AND #3                                                                                                                                                                                                                                                                                                                                                                                                                                                                                             |

## EMBASE

| Searching strategy |                                                                                                                                                                                                                                                                                                                                                                                                                                                                                                                                                                                          |
|--------------------|------------------------------------------------------------------------------------------------------------------------------------------------------------------------------------------------------------------------------------------------------------------------------------------------------------------------------------------------------------------------------------------------------------------------------------------------------------------------------------------------------------------------------------------------------------------------------------------|
| #1                 | ('neuralgia'/exp OR neuralgia OR 'mononeuropathy'/exp OR mononeuropathy OR 'nerve'/exp OR nerve) AND ('compression'/exp OR compression) AND syndromes OR 'polyneuropathies'/exp OR polyneuropathies                                                                                                                                                                                                                                                                                                                                                                                      |
| #2                 | 'peripheral neuropathy'/exp OR 'neuropathy' OR 'neuropathic pain' OR 'neuralgia'                                                                                                                                                                                                                                                                                                                                                                                                                                                                                                         |
| #3                 | 'medicinal plant'/exp OR 'medicinal plant' OR 'herbaceous agent'/exp OR 'herbaceous agent' OR 'chinese medicine'/exp OR 'chinese medicine' OR 'kampo medicine'/exp OR 'kampo medicine' OR 'kampo medicine (drug)'/exp OR 'kampo medicine (drug)' OR 'korean medicine'/exp OR 'korean medicine' OR 'herbal medicine'/exp OR 'herbal medicine' OR 'prescription drug'/exp OR 'prescription drug' OR 'oriental medicine'/exp OR 'oriental medicine' OR 'alternative medicine'/exp OR 'alternative medicine' OR 'complementary medicine' OR 'herb'/exp OR 'herb' OR 'decoction' OR 'botanic' |
| #4                 | #1 AND #2 AND #3                                                                                                                                                                                                                                                                                                                                                                                                                                                                                                                                                                         |

## CENTRAL

| Searching strategy |                                                       |
|--------------------|-------------------------------------------------------|
| #1                 | MeSH descriptor: [Mononeuropathies] explode all trees |
| #2                 | (Mononeuropathies):ti,ab,kw                           |
| #3                 | MeSH descriptor: [Neuralgia] explode all trees        |

|     |                                                                                                                                                                      |
|-----|----------------------------------------------------------------------------------------------------------------------------------------------------------------------|
| #4  | ("neuropathy" OR "peripheral neuropathy" OR "neuropathic pain" OR "neuralgia"):ti,ab,kw                                                                              |
| #5  | MeSH descriptor: [Plants, Medicinal] explode all trees                                                                                                               |
| #6  | MeSH descriptor: [Drugs, Chinese Herbal] explode all trees                                                                                                           |
| #7  | MeSH descriptor: [Medicine, Chinese Traditional] explode all trees                                                                                                   |
| #8  | MeSH descriptor: [Medicine, Kampo] explode all trees                                                                                                                 |
| #9  | MeSH descriptor: [Medicine, Korean Traditional] explode all trees                                                                                                    |
| #10 | MeSH descriptor: [Herbal Medicine] explode all trees                                                                                                                 |
| #11 | MeSH descriptor: [Prescription Drugs] explode all trees                                                                                                              |
| #12 | ("traditional Korean medicine" OR "traditional Chinese medicine" OR "Traditional oriental medicine" OR "Kampo medicine" OR herb* OR decoction* OR botanic*):ti,ab,kw |
| #13 | (#1 OR #2) AND (#3 OR #4) AND (#5 OR #6 OR #7 OR #8 OR #9 OR #10 OR #11 OR #12) in Trials                                                                            |
